# Supplementary material
Source: Springer Nature journal article supplement (https://www.springermedizin.de/resource/supplementary/12889_2014_7030_MOESM1_ESM.pdf/9499664)

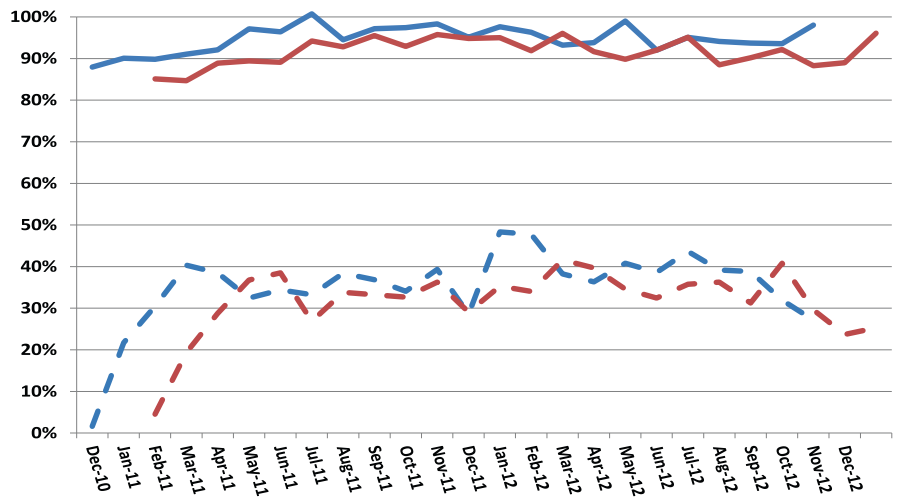

Supplement: MOESM1 [file 9499664]
